# Supplementary material for: A Pilot Study on Biochemical Profile of Follicular Fluid in Breast Cancer Patients
Source: MDPI journal article supplement (doi:10.3390/metabo13030441), 2023-03-17
Supplement: s1 [file s1]

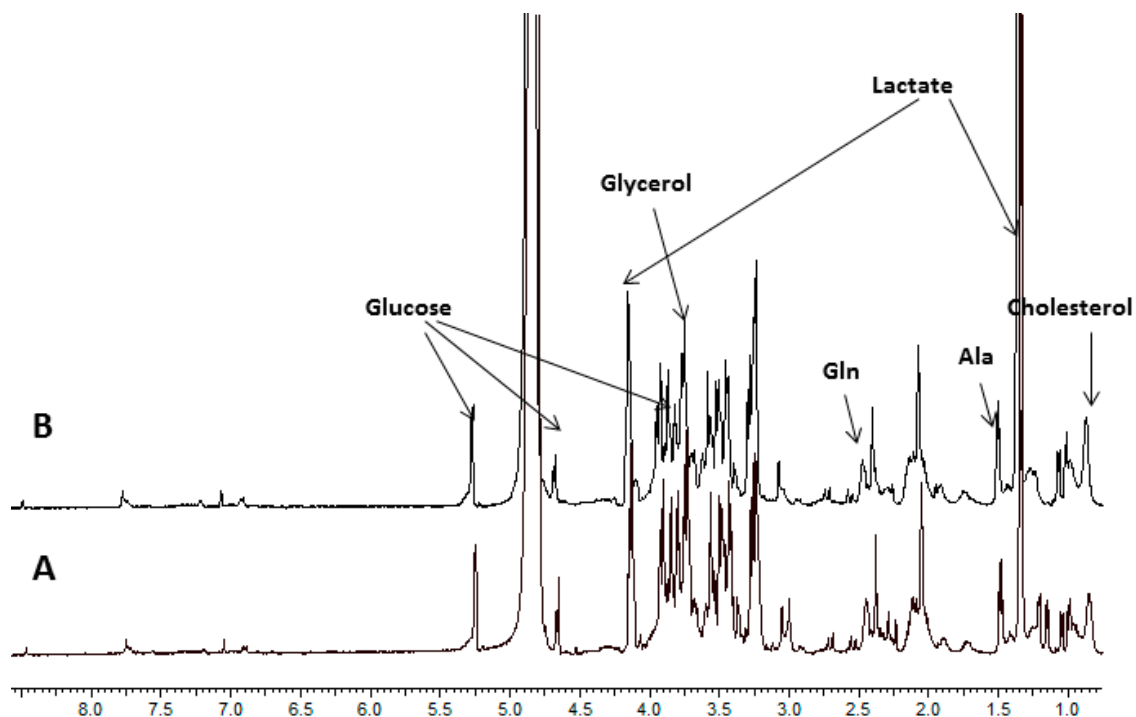

**Figure S1.** Representative  $^1\text{H}$ -NMR spectra of follicular fluids from an healthy control (A) and a breast cancer patient (B).

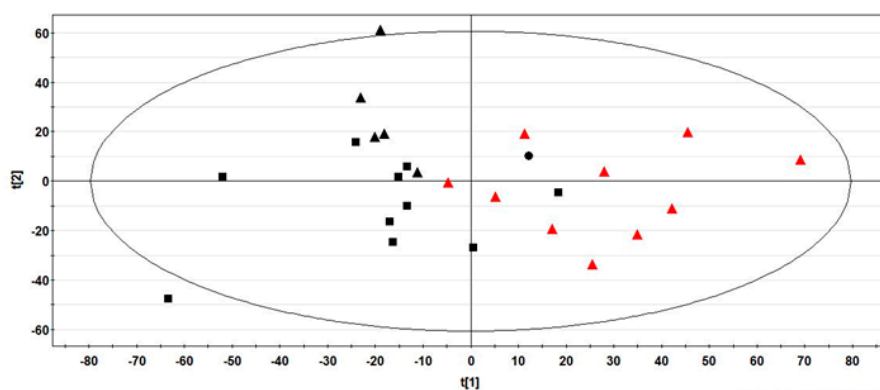

**Figure S2.** Partial Least Square Discriminant Analysis score plots obtained from the  $^1\text{H}$ -NMR spectral data on FF of the 26 women examined in the study. For this two-component model the  $R^2X$  value was 0.34 and the  $Q^2$  value was 0.19. Healthy women ( $n = 10$ ) were compared with BC patients subdivided in two groups: without and with lymph node metastasis. Healthy controls were represented by red triangle. BC patients are shown in black with different symbols: patients with no lymph node metastasis ( $n = 10$ ), boxes; patients with N1 ( $n = 5$ ), and N2 lymph node metastasis ( $n = 1$ ), triangles and dot, respectively.
