# Supplementary material for: A Pilot Study on Biochemical Profile of Follicular Fluid in Breast Cancer Patients
Source: MDPI journal article supplement (doi:10.3390/metabo13030441), 2023-03-17
Supplement: s1 [file s1]

**Supplementary Table S1.** Marker metabolites identified by NMR in follicular fluids of healthy (N = 10) and breast cancer women (N = 16). The average integrals of the NMR bin regions  $\pm$  standard deviations are reported.

| Metabolite  | $\delta$ (ppm) | Healthy           | Oncological         | VIP | p-Value |
|-------------|----------------|-------------------|---------------------|-----|---------|
| Asparagine  | 2.88           | 256.7 $\pm$ 259.9 | 66.9 $\pm$ 75.9 ↓   | 4.0 | 0.01    |
| Aspartate   | 3.80           | 329.9 $\pm$ 138.9 | 237.7 $\pm$ 69.7 ↓  | 2.6 | 0.03    |
| Cholesterol | 0.88           | 122.1 $\pm$ 34.9  | 87.2 $\pm$ 30.5 ↓   | 1.7 | 0.01    |
| Choline     | 3.16           | 259.6 $\pm$ 225.3 | 101.9 $\pm$ 128.6 ↓ | 3.6 | 0.03    |
| Creatine    | 3.92           | 240.6 $\pm$ 61.3  | 272.8 $\pm$ 53.0 ↑  | 1.5 | -       |
| Glutamine   | 2.48           | 46.9 $\pm$ 13.2   | 35.2 $\pm$ 13.7 ↓   | 1.0 | 0.04    |
| Glycerol    | 3.76           | 313.8 $\pm$ 82.4  | 354.4 $\pm$ 84.9 ↑  | 1.6 | -       |
| -glucose    | 3.72           | 283.1 $\pm$ 54.5  | 354.4 $\pm$ 84.9 ↑  | 2.5 | 0.03    |
| -glucose    | 3.84           | 212.8 $\pm$ 59.1  | 268.6 $\pm$ 54.6 ↑  | 2.2 | 0.02    |
| -glucose    | 4.64           | 56.9 $\pm$ 26.2   | 239.4 $\pm$ 187.4 ↑ | 4.1 | 0.006   |
| Lactate     | 1.36           | 643.8 $\pm$ 122.7 | 486.7 $\pm$ 188.5 ↓ | 2.9 | -       |
| Lipid       | 2.76           | 61.9 $\pm$ 71.9   | 23.2 $\pm$ 8.3 ↓    | 1.7 | 0.04    |
| Lipid       | 1.28           | 165.0 $\pm$ 136.8 | 77.5 $\pm$ 22.8 ↓   | 2.7 | 0.01    |
| Lysine      | 1.44           | 50.6 $\pm$ 31.5   | 26.5 $\pm$ 8.3 ↓    | 1.5 | 0.007   |
| Proline     | 2.04           | 154.2 $\pm$ 33.3  | 178.4 $\pm$ 60.3 ↑  | 1.3 | -       |
| TMAO        | 3.32           | 48.4 $\pm$ 4.5    | 38.2 $\pm$ 9.1 ↓    | 1.0 | 0.003   |

VIP = variable importance in the projection; TMAO = Trimethylamine-N-oxide, - not significant
